# Supplementary material
Source: publisher figshare collection journal article supplement (https://frontiersin.figshare.com/ndownloader/files/26496782)

**Temporal variability of planktonic ciliates in a coastal oligotrophic environment: mixotrophy, size classes and vertical distribution**

**Filomena Romano1,2, Katerina Symiakaki1, Paraskevi Pitta1, ***

1 Institute of Oceanography, Hellenic Centre for Marine Research, Heraklion, Crete, Greece

2 Department of Biology, University of Copenhagen, Helsingør, Denmark

*corresponding author: vpitta@hcmr.gr

**Supplementary tables**

**Table S1.** Minimum and maximum values of PO4 and DIN at each month during year 2019. NA = not available.

|  | PO4 | DIN |
| --- | --- | --- |
|  | µM | |
| January | 0.000 - 0.003 | 0.74 - 1.24 |
| March | 0.005 - 0.090 | 0.06 - 2.40 |
| April | 0.000 - 0.011 | 0.34 - 2.11 |
| May | 0.004 - 0.011 | 0.51 - 1.75 |
| June | 0.001 - 0.007 | NA |
| July | 0.002 - 0.210 | 0.31 - 3.60 |
| September | 0.001 - 0.006 | 0.49 - 1.34 |
| October | 0.002 - 0.014 | 0.49 - 1.19 |
| November | 0.002 - 0.013 | 0.62 - 0.98 |
| December | 0.001 - 0.006 | 0.47 - 1.19 |

**Table S2.** Integrated abundance (x 106 cells m-2) and biomass (µg C m-2) of total ciliates and percentage contribution of mixotrophic and heterotrophic ciliates to integrated total abundance and biomass. NA: data not available.

| **Month** | **Total ciliates** | | **% Integrated abundance** | | **% Integrated biomass** | |
| --- | --- | --- | --- | --- | --- | --- |
|  | Abundance | Biomass | Mixotrophs | Heterotrophs | Mixotrophs | Heterotrophs |
| January | 21.19 | NA | 40.40 | 59.60 | NA | NA |
| March | 8.21 | 224.90 | 22.17 | 77.83 | 38.59 | 61.41 |
| April | 20.30 | 148.06 | 9.02 | 90.98 | 9.27 | 90.73 |
| May | 19.68 | 287.67 | 25.49 | 74.51 | 32.19 | 67.81 |
| June | 21.40 | 313.10 | 33.77 | 66.23 | 37.43 | 62.57 |
| July | 25.50 | 377.11 | 25.22 | 74.78 | 17.96 | 82.04 |
| September | 28.01 | 564.24 | 32.86 | 67.14 | 20.89 | 79.11 |
| October | 19.58 | 298.09 | 24.31 | 75.69 | 14.09 | 85.91 |
| November | 18.92 | 379.03 | 13.29 | 86.71 | 29.43 | 70.57 |
| December | 22.50 | 223.51 | 24.98 | 75.02 | 18.49 | 81.51 |

**Table S3**. Percentage of cell loss between two series of samples fixed with Lugol and formol.

| **Month** | **% Cell loss** |
| --- | --- |
| January | 38.18 |
| March | 35.00 |
| April | 37.00 |
| May | 34.10 |
| June | 63.42 |
| July | 58.32 |
| September | 55.29 |
| October | 64.61 |
| November | 40.15 |
| December | 41.72 |

**Table S4**. Results of 2-way ANOVA (water column structure by depth) for abundance of different size classes (Very small: <18, Small: 18-30, Medium: 30-50, Large: >50 µm) of heterotrophic ciliates. The “water column structure” analyses to mixing, intermediate and stratification periods, while “depth” comprises seven sampling depths from surface to 120 m. *p<0.05, **p<0.01, ***p<0.001, ns: not significant.

|  | **Water column structure** | | |  | **Depth** | | |  |
| --- | --- | --- | --- | --- | --- | --- | --- | --- |
|  | F value | Df | p value | Tukey test | F value | Df | p value | Tukey test |
| **Very small** | 0.18 | 2 | ns |  | 0.33 | 6 | ns |  |
| **Small** | 0.69 | 2 | ns |  | 1.94 | 6 | ns |  |
| **Medium** | 0.02 | 2 | 0.02* | Stratified-mixed* | 6.66 | 6 | 0.00*** | 120-75*  120-20*  120-10***  100-10*  120-2* |
| **Large** | 0.07 | 2 | ns |  | 2.23 | 6 | ns |  |

**Fig. S1**. Correlation between formaldehyde and Lugol counts of total ciliates (A), very small (B) and large (C) ciliates. The regression line is represented by the black line and R2 and p value are reported in the graph.


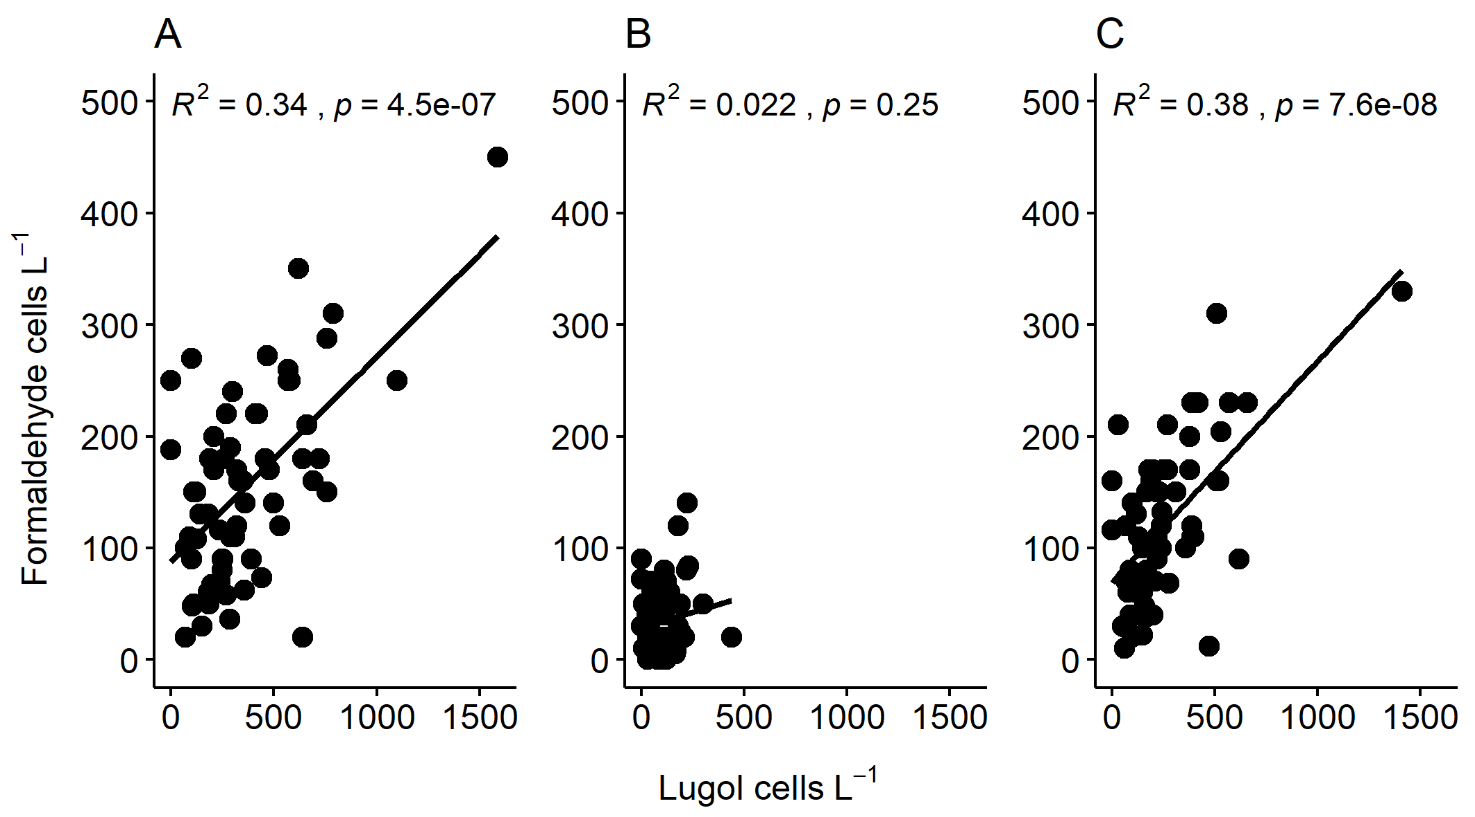

Supplement: Supplementary file 1 [file 26496782]
